# Supplementary material for: Impact of Chronic Disease Self-Management Program on the Self-Perceived Health of People in Areas of Social Vulnerability in Asturias, Spain
Source: MDPI journal article supplement (doi:10.3390/healthcare12080811), 2024-04-09
Supplement: s1 [file s1]

**Supplementary Table S1: Recategorization of items from the Gijón Scale**

| Scale item                                                                                                           | Recategorization | Included categories                                                                                                                                                                                                                                                                                                                                                |
|----------------------------------------------------------------------------------------------------------------------|------------------|--------------------------------------------------------------------------------------------------------------------------------------------------------------------------------------------------------------------------------------------------------------------------------------------------------------------------------------------------------------------|
| Low level of income<br>(choose only one answer, the most suitable)                                                   | Yes              | From 707 to 1060 euros per month.<br>From 443 to 706 euros per month.<br>I receive a non-contributory pension, for disability or social assistance.<br>Less than the previous sections or I have no income)                                                                                                                                                        |
|                                                                                                                      | No               | More than 1060 euros per month                                                                                                                                                                                                                                                                                                                                     |
| Living alone                                                                                                         | Yes              | I live alone and I am independent.<br>I live alone with close family and have some degree of dependency.<br>I live alone and isolated and have some degree of dependency.                                                                                                                                                                                          |
|                                                                                                                      | No               | I live accompanied with or without dependence                                                                                                                                                                                                                                                                                                                      |
| Absence of social relationships<br>(choose only one answer, the most suitable)                                       | Yes              | I don't leave the house or receive visitors (or less than once a week)                                                                                                                                                                                                                                                                                             |
|                                                                                                                      | No               | I maintain social relationships outside the home with many people.<br>I interact with family and neighbors/friends and leave the house.<br>I only interact with family and leave the house.<br>I don't leave the house, but I receive visitors (at least once a week)                                                                                              |
| Absence of social support<br>What type of social support do you have?<br>(choose only one answer, the most suitable) | Yes              | I need permanent care that is not given.                                                                                                                                                                                                                                                                                                                           |
|                                                                                                                      | No               | I don't need any support.<br>I receive support from family and/or neighbors/friends.<br>I receive formal or voluntary home help.<br>I receive help in a residence.                                                                                                                                                                                                 |
| Inadequate housing<br>(choose only one answer, the most suitable)                                                    | Yes              | Has architectural barriers inside or at the entrance of the house.<br>It has humidity (or similar problems) or is not adequately equipped (incomplete bathroom, absence of hot water, heating, ...)<br>Absence of elevator (if living in an apartment) or telephone.<br>It is inadequate: a shanty, declared in ruins, lack of minimal equipment, overcrowded, ... |
|                                                                                                                      | No               | It is suitable for my needs.                                                                                                                                                                                                                                                                                                                                       |

Source: (Cabrera González et al., 1999)

Supplementary Table S2. Global bivariate for change in SPH

|                                                                    |                                             | GLOBAL      |      | WORSENING<br>n=62 (18.7%) |      | NO IMPROVEMENT<br>n=65 (19.6%) |      | REMAINED WELL<br>n=129 (38.9%) |      | IMPROVEMENT<br>n=76 (22.9%) |      | P-VALUE |
|--------------------------------------------------------------------|---------------------------------------------|-------------|------|---------------------------|------|--------------------------------|------|--------------------------------|------|-----------------------------|------|---------|
| VARIABLES                                                          |                                             | Mean (SD)   |      | Mean (SD)                 |      | Mean (SD)                      |      | Mean (SD)                      |      | Mean (SD)                   |      |         |
| <b>AGE (n=330)</b>                                                 |                                             | 60.5 (15.1) |      | 62.2 (14.7)               |      | 66 (13.5)                      |      | 59.7 (15.1)                    |      | 55.8 (15.2)                 |      | 0.756   |
| <b>SOCIAL RISK (Continuous variable*) (n=283)</b>                  |                                             | 8.70 (2.6)  |      | 8.0(2.6)                  |      | 9.9 (2.8)                      |      | 8.1 (2.2)                      |      | 9.4 (2.5)                   |      | 0.140   |
| Variable                                                           | Categories (base code in front)             | n           | %    | n                         | %    | n                              | %    | n                              | %    | n                           | %    |         |
| <b>Participant type (n=326)</b>                                    | <b>Chronic</b>                              | 227         | 69.6 | 40                        | 17.6 | 52                             | 22.9 | 75                             | 33.0 | 60                          | 26.4 | 0.001   |
|                                                                    | <b>Caregiver</b>                            | 71          | 21.8 | 15                        | 21.1 | 5                              | 7.0  | 41                             | 57.8 | 10                          | 14.1 |         |
|                                                                    | <b>Both</b>                                 | 28          | 8.59 | 3                         | 10.7 | 8                              | 28.6 | 13                             | 46.4 | 4                           | 14.3 |         |
| <b>Sex (n=331)</b>                                                 | <b>Man</b>                                  | 108         | 32.6 | 19                        | 17.6 | 16                             | 14.8 | 39                             | 36.1 | 3                           | 4    | 0.065   |
|                                                                    | <b>Women</b>                                | 223         | 67.4 | 43                        | 19.3 | 48                             | 21.5 | 90                             | 40.4 | 42                          | 18.8 |         |
| <b>MIGRATION STATUS (Country of birth) (n=329)</b>                 | <b>Yes (Other country)</b>                  | 3           | 10.3 | 9                         | 26.5 | 5                              | 14.7 | 12                             | 39.7 | 8                           | 23.5 | 0.62    |
|                                                                    | <b>No (Spain)</b>                           | 295         | 89.7 | 53                        | 18.0 | 59                             | 20   | 117                            | 35.3 | 66                          | 22.4 |         |
| <b>EDUCATIONAL LEVEL (three categories) (n=323)</b>                | <b>Primary or less</b>                      | 161         | 49.9 | 23                        | 14.3 | 42                             | 26.1 | 62                             | 38.5 | 3                           | 4    | 0.008   |
|                                                                    | <b>Secondary</b>                            | 121         | 37.5 | 23                        | 19.0 | 16                             | 13.2 | 47                             | 38.8 | 35                          | 28.9 |         |
|                                                                    | <b>University students</b>                  | 41          | 12.7 | 13                        | 31.7 | 6                              | 14.6 | 18                             | 43.9 | 4                           | 9.8  |         |
| <b>RESIDENCE INSTITUTION (n=332)</b>                               | <b>None</b>                                 | 261         | 78.6 | 49                        | 18.8 | 53                             | 20.3 | 110                            | 42.2 | 49                          | 18.8 | 0.004   |
|                                                                    | <b>Nursing home</b>                         | 7           | 2.1  | 3                         | 42.9 | 3                              | 42.9 | 0                              | 0    | 1                           | 14.3 |         |
|                                                                    | <b>Prison facility</b>                      | 47          | 1.95 | 8                         | 17.0 | 6                              | 12.8 | 16                             | 34.0 | 17                          | 36.2 |         |
|                                                                    | <b>Alcohol withdrawal center</b>            | 17          | 5.1  | 2                         | 11.8 | 3                              | 17.7 | 3                              | 17.7 | 9                           | 52.9 |         |
| <b>RESIDENCE AREA (n=325)</b>                                      | <b>Rural Peasant</b>                        | 75          | 23.1 | 17                        | 22.7 | 11                             | 14.7 | 30                             | 40   | 17                          | 22.7 | 0.148   |
|                                                                    | <b>Rural Intensive</b>                      | 131         | 40.3 | 16                        | 12.2 | 33                             | 25.2 | 51                             | 38.9 | 31                          | 23.7 |         |
|                                                                    | <b>Peri urban Peasant</b>                   | 41          | 12.6 | 13                        | 31.7 | 10                             | 24.4 | 12                             | 29.3 | 6                           | 14.6 |         |
|                                                                    | <b>Intensive Peri urban</b>                 | 42          | 12.9 | 7                         | 16.7 | 5                              | 11.9 | 20                             | 47.6 | 10                          | 23.8 |         |
|                                                                    | <b>Urban</b>                                | 36          | 2.6  | 8                         | 22.2 | 6                              | 16.7 | 11                             | 30.6 | 11                          | 30.6 |         |
| <b>SOCIAL RISK GLOBAL ASSESSMENT (Gijón Questionnaire) (n=283)</b> | <b>Risk free</b>                            | 188         | 66.4 | 42                        | 22.3 | 24                             | 12.8 | 87                             | 46.3 | 35                          | 18.6 | 0.000   |
|                                                                    | <b>With socio-familial risk</b>             | 88          | 31.1 | 9                         | 10.2 | 26                             | 29.6 | 26                             | 29.6 | 27                          | 30.7 |         |
|                                                                    | <b>Socio-familial problems</b>              | 7           | 2.5  | 2                         | 28.6 | 3                              | 42.9 | 0                              | 0    | 2                           | 28.6 |         |
| <b>SOCIAL RISK GLOBAL ASSESSMENT (Gijón Questionnaire) (n=283)</b> | <b>Risk free</b>                            | 188         | 66.4 | 42                        | 22.3 | 24                             | 12.8 | 87                             | 46.3 | 35                          | 18.6 | 0.000   |
|                                                                    | <b>At risk/with socio-familial problems</b> | 95          | 33.6 | 11                        | 11.6 | 29                             | 30.5 | 26                             | 27.4 | 29                          | 30.5 |         |
| <b>VARIABLES OF THE GIJÓN QUESTIONNAIRE DICHOTOMIZED</b>           |                                             | n           | %    | n                         | %    | n                              | %    | n                              | %    | n                           | %    |         |
| <b>LOW LEVEL OF INCOME (n=307)</b>                                 | <b>Yes</b>                                  | 205         | 66.8 | 27                        | 13.2 | 46                             | 22.4 | 76                             | 37.1 | 56                          | 27.3 | 0.001   |
|                                                                    | <b>No</b>                                   | 102         | 33.2 | 28                        | 27.5 | 16                             | 15.7 | 45                             | 44.1 | 13                          | 12.8 |         |
| <b>LIVE ALONE (n=324)</b>                                          | <b>Yes</b>                                  | 84          | 25.9 | 16                        | 19.1 | 21                             | 25.0 | 26                             | 31.0 | 21                          | 25   | 0.217   |
|                                                                    | <b>No</b>                                   | 240         | 74.1 | 45                        | 18.8 | 41                             | 17.1 | 102                            | 42.5 | 52                          | 21.7 |         |
| <b>ABSENCE OF SOCIAL RELATIONSHIPS (n=326)</b>                     | <b>Yes</b>                                  | 6           | 1.8  | 1                         | 16.7 | 2                              | 33.3 | 2                              | 33.3 | 1                           | 16.7 | 0.854   |
|                                                                    | <b>No</b>                                   | 320         | 98.2 | 61                        | 19.1 | 61                             | 19.1 | 126                            | 39.4 | 72                          | 22.5 |         |
| <b>ABSENCE OF SOCIAL SUPPORT (n=312)</b>                           | <b>Yes</b>                                  | 2           | 0.6  | 0                         | 0.0  | 1                              | 50.0 | 0                              | 0.0  | 1                           | 50.0 | 0.419   |
|                                                                    | <b>No</b>                                   | 310         | 99.4 | 60                        | 19.4 | 58                             | 18.7 | 121                            | 39.0 | 71                          | 22.9 |         |
| <b>INADEQUATE HOUSING (n=327)</b>                                  | <b>Yes</b>                                  | 61          | 18.7 | 7                         | 11.5 | 19                             | 31.2 | 19                             | 31.2 | 16                          | 26.2 | 0.025   |
|                                                                    | <b>No</b>                                   | 266         | 81.4 | 54                        | 20.3 | 44                             | 16.5 | 110                            | 41.4 | 58                          | 21.8 |         |

\* Gijón Scale: minimum score =5 and maximum =25 points. Sections: <10 indicates no socio-familial risk, 10 to 14 in risk, >15 problems

Supplementary Table S3. Bivariate analysis for change in SPH in men

|                                                                            |                                             | GLOBAL      |          | WORSENING<br>(n=19; 17.6%) |          | NO IMPROVEMENT<br>(n=16; 14.8%) |          | REMAINED WELL<br>(n=39; 36.1%) |          | IMPROVEMENT<br>(n= 34; 31.5%) |          | P-VALUE |
|----------------------------------------------------------------------------|---------------------------------------------|-------------|----------|----------------------------|----------|---------------------------------|----------|--------------------------------|----------|-------------------------------|----------|---------|
| VARIABLES                                                                  |                                             | Mean (SD)   |          | Mean (SD)                  |          | Mean (SD)                       |          | Mean (SD)                      |          | Mean (SD)                     |          |         |
| <b>AGE (n=107)</b>                                                         |                                             | 55.7 (16.8) |          | 63.3(16.0)                 |          | 62.1(16.5)                      |          | 54.3(17.9)                     |          | 50.0(13.7)                    |          | 0.504   |
| <b>SOCIAL RISK (Continuous *) (n=92)</b>                                   |                                             | 9.2 (3.2)   |          | 8.4 (3.7)                  |          | 10.5(4.0)                       |          | 8.5 (2.7)                      |          | 9.8 (2.8)                     |          | 0.227   |
| <b>Variable</b>                                                            | <b>Categories (base code in front)</b>      | <b>n</b>    | <b>%</b> | <b>n</b>                   | <b>%</b> | <b>n</b>                        | <b>%</b> | <b>n</b>                       | <b>%</b> | <b>n</b>                      | <b>%</b> |         |
| <b>Participant type<br/>(n=106)</b>                                        | <b>Chronic</b>                              | 16          | 15.1     | 14                         | 16.9     | 13                              | 14.9     | 30                             | 34.5     | 30                            | 34.5     | 0.102   |
|                                                                            | <b>Caregiver</b>                            | 87          | 82.1     | 3                          | 18.8     | 1                               | 6.25     | 9                              | 56.3     | 3                             | 18.8     |         |
|                                                                            | <b>Both</b>                                 | 3           | 2.8      | 0                          | 0.0      | 2                               | 66.7     | 0                              | 0.0      | 1                             | 33.3     |         |
| <b>MIGRATION STATUS (Country<br/>of birth) (n=106)</b>                     | <b>Yes (Other country)</b>                  | 13          | 12.3     | 5                          | 38.5     | 0                               | 0.0      | 4                              | 30.8     | 4                             | 30.8     | 0.118   |
|                                                                            | <b>No (Spain)</b>                           | 93          | 87.7     | 14                         | 15.1     | 16                              | 17.2     | 35                             | 37.6     | 28                            | 30.1     |         |
| <b>EDUCATIONAL LEVEL (n=105)</b>                                           | <b>Primary or less</b>                      | 45          | 42.9     | 6                          | 13.3     | 8                               | 17.8     | 22                             | 48.9     | 9                             | 20       | 0.041   |
|                                                                            | <b>Secondary</b>                            | 47          | 44.8     | 8                          | 17.0     | 5                               | 10.6     | 14                             | 29.8     | 20                            | 42.6     |         |
|                                                                            | <b>University students</b>                  | 13          | 12.4     | 5                          | 38.5     | 3                               | 23.1     | 2                              | 15.4     | 3                             | 23.1     |         |
| <b>RESIDENCE INSTITUTION<br/>(n=108)</b>                                   | <b>None</b>                                 | 51          | 47.2     | 11                         | 21.6     | 8                               | 15.7     | 21                             | 41.2     | 11                            | 21.6     | 0.189   |
|                                                                            | <b>Nursing home</b>                         | 4           | 3.7      | 1                          | 25.0     | 2                               | 50       | 0                              | 0        | 1                             | 25.0     |         |
|                                                                            | <b>Prison facility</b>                      | 42          | 38.9     | 6                          | 14.3     | 4                               | 9.5      | 16                             | 38.1     | 16                            | 38.1     |         |
|                                                                            | <b>Alcohol withdrawal center</b>            | 11          | 7.5      | 1                          | 9.1      | 2                               | 18.2     | 2                              | 18.2     | 6                             | 54.6     |         |
| <b>RESIDENCE AREA (n=107)</b>                                              | <b>Rural Peasant</b>                        | 21          | 19.6     | 5                          | 23.8     | 2                               | 9.5      | 7                              | 33.3     | 7                             | 33.3     | 0.600   |
|                                                                            | <b>Rural Intensive</b>                      | 87          | 81.3     | 9                          | 15.8     | 8                               | 14.0     | 22                             | 38.6     | 18                            | 32.6     |         |
|                                                                            | <b>Peri urban Peasant</b>                   | 8           | 7.5      | 1                          | 12.5     | 3                               | 37.5     | 3                              | 37.5     | 1                             | 12.5     |         |
|                                                                            | <b>Intensive Peri urban</b>                 | 8           | 7.5      | 2                          | 25       | 1                               | 12.5     | 4                              | 50.0     | 1                             | 12.5     |         |
|                                                                            | <b>Urban</b>                                | 13          | 12.1     | 2                          | 15.4     | 2                               | 15.4     | 2                              | 15.4     | 7                             | 54.9     |         |
| <b>SOCIAL RISK GLOBAL<br/>ASSESSMENT (Gijón<br/>Questionnaire) (n=283)</b> | <b>Risk free</b>                            | 52          | 56.5     | 12                         | 23.1     | 7                               | 13.5     | 21                             | 40.4     | 12                            | 23.1     | 0.086   |
|                                                                            | <b>At risk/with socio-familial problems</b> | 40          | 43.5     | 4                          | 10       | 8                               | 20       | 11                             | 27.5     | 17                            | 42.5     |         |
| <b>VARIABLES OF THE GIJÓN QUESTIONNAIRE DICHOTOMIZED</b>                   |                                             | <b>n</b>    | <b>%</b> | <b>n</b>                   | <b>%</b> | <b>n</b>                        | <b>%</b> | <b>n</b>                       | <b>%</b> | <b>n</b>                      | <b>%</b> |         |
| <b>LOW LEVEL OF INCOME<br/>(n=102)</b>                                     | <b>Yes</b>                                  | 63          | 61.8     | 6                          | 9.5      | 9                               | 14.3     | 22                             | 34.9     | 26                            | 41.3     | 0.040   |
|                                                                            | <b>No</b>                                   | 39          | 38.2     | 10                         | 25.6     | 7                               | 18.0     | 15                             | 38.5     | 7                             | 18.0     |         |
| <b>LIVE ALONE (n=105)</b>                                                  | <b>Yes</b>                                  | 32          | 30.5     | 6                          | 18.8     | 10                              | 31.3     | 6                              | 18.8     | 10                            | 31.3     | 0.009   |
|                                                                            | <b>No</b>                                   | 73          | 69.5     | 13                         | 17.8     | 6                               | 8.2      | 32                             | 43.8     | 22                            | 30.1     |         |
| <b>ABSENCE OF SOCIAL<br/>RELATIONSHIPS (n=104)</b>                         | <b>Yes</b>                                  | 6           | 5.8      | 1                          | 16.7     | 2                               | 33.3     | 2                              | 33.3     | 1                             | 16.7     | 0.630   |
|                                                                            | <b>No</b>                                   | 98          | 94.2     | 18                         | 18.4     | 14                              | 14.3     | 36                             | 36.7     | 30                            | 30.6     |         |
| <b>ABSENCE OF SOCIAL SUPPORT<br/>(n=99)</b>                                | <b>Yes</b>                                  | 2           | 2.0      | 0                          | 0.0      | 1                               | 50.0     | 0                              | 0.0      | 1                             | 50.0     | 0.398   |
|                                                                            | <b>No</b>                                   | 97          | 98.0     | 19                         | 19.6     | 14                              | 14.4     | 3.4                            | 35.1     | 30                            | 30.9     |         |
| <b>INADEQUATE HOUSING<br/>(n=106)</b>                                      | <b>Yes</b>                                  | 19          | 17.9     | 3                          | 15.8     | 3                               | 15.8     | 8                              | 42.1     | 5                             | 26.3     | 0.949   |
|                                                                            | <b>No</b>                                   | 87          | 82.1     | 16                         | 18.4     | 13                              | 14.9     | 31                             | 35.6     | 27                            | 31.0     |         |

\* Gijón  
Scale:

minimum score =5 and maximum =25 points. Sections: <10 indicates no socio-familial risk, 10 to 14 in risk, >15 problems

Supplementary Table S4. Bivariate for change in SPH in women

|                                                                    |                                      | GLOBAL      |      | WORSENING<br>(n= 43; 19.3%) |      | NO IMPROVEMENT<br>(n= 48; 21.5%) |      | REMAINED WELL<br>(n= 90; 40.4%) |      | IMPROVEMENT<br>(n= 42; 18.8%) |      | P-VALUE |
|--------------------------------------------------------------------|--------------------------------------|-------------|------|-----------------------------|------|----------------------------------|------|---------------------------------|------|-------------------------------|------|---------|
| VARIABLES                                                          |                                      | Mean (SD)   |      | Mean (SD)                   |      | Mean (SD)                        |      | Mean (SD)                       |      | Mean (SD)                     |      |         |
| AGE (n=222)                                                        |                                      | 62.8 (13.7) |      | 61.7 (14.2)                 |      | 67.5 (12.3)                      |      | 62.0 (13.1)                     |      | 60.4 (14.8)                   |      | 0.598   |
| SOCIAL RISK (Continuous*) (n=191)                                  |                                      | 8.4 (2.2)   |      | 171 (2.0)                   |      | 9.7 (2.2)                        |      | 7.9 (1.9)                       |      | 8.9 (2.2)                     |      | 0.677   |
| Variable                                                           | Categories                           | n           | %    | n                           | %    | n                                | %    | n                               | %    | n                             | %    |         |
| Participant type<br>(n=219)                                        | Chronic                              | 139         | 63.5 | 26                          | 18.7 | 38                               | 27.3 | 45                              | 32.4 | 30                            | 21.6 | 0.007   |
|                                                                    | Caregiver                            | 55          | 25.1 | 12                          | 21.8 | 4                                | 7.3  | 32                              | 58.2 | 7                             | 12.7 |         |
|                                                                    | Both                                 | 25          | 11.4 | 3                           | 12.0 | 6                                | 24.0 | 13                              | 52.0 | 3                             | 12.0 |         |
| MIGRATION STATUS (Country<br>of birth) (n=222)                     | Yes (Other country)                  | 21          | 9.5  | 4                           | 19.1 | 5                                | 23.8 | 8                               | 38.1 | 4                             | 19.1 | 0.999   |
|                                                                    | No (Spain)                           | 201         | 90.5 | 39                          | 19.4 | 42                               | 20.9 | 82                              | 40.8 | 28                            | 18.9 |         |
| EDUCATIONAL LEVEL (n=217)                                          | Primary or less                      | 115         | 53   | 17                          | 14.8 | 33                               | 28.7 | 40                              | 34.8 | 25                            | 21.7 | 0.017   |
|                                                                    | Secondary                            | 74          | 34.1 | 15                          | 20.3 | 11                               | 14.9 | 33                              | 44.6 | 15                            | 20.3 |         |
|                                                                    | University students                  | 28          | 12.9 | 8                           | 28.6 | 3                                | 10.7 | 16                              | 57.1 | 1                             | 3.6  |         |
| RESIDENCE INSTITUTION<br>(n=223)                                   | None                                 | 209         | 93.7 | 38                          | 18.2 | 44                               | 21.1 | 89                              | 42.6 | 38                            | 18.2 | 0.127   |
|                                                                    | Nursing home                         | 3           | 1.3  | 2                           | 66.7 | 1                                | 33.3 | 0                               | 0    | 0                             | 0    |         |
|                                                                    | Prison facility                      | 5           | 2.2  | 2                           | 40   | 2                                | 40   | 0                               | 0    | 1                             | 20   |         |
|                                                                    | Alcohol withdrawal center            | 6           | 2.7  | 1                           | 16.7 | 1                                | 16.7 | 1                               | 16.7 | 3                             | 50   |         |
| RESIDENCE AREA (n=217)                                             | Rural Peasant                        | 54          | 24.8 | 12                          | 22.2 | 9                                | 16.7 | 23                              | 42.6 | 10                            | 18.5 | 0.056   |
|                                                                    | Rural Intensive                      | 74          | 3.1  | 7                           | 9.5  | 25                               | 33.8 | 29                              | 39.2 | 13                            | 17.6 |         |
|                                                                    | Peri urban Peasant                   | 32          | 14.7 | 12                          | 37.5 | 6                                | 18.8 | 9                               | 28.1 | 5                             | 15.6 |         |
|                                                                    | Intensive Peri urban                 | 3.4         | 15.7 | 5                           | 14.7 | 4                                | 11.8 | 16                              | 47.1 | 9                             | 26.5 |         |
|                                                                    | Urban                                | 23          | 10.6 | 6                           | 26.1 | 4                                | 17.4 | 9                               | 39.1 | 4                             | 17.4 |         |
| SOCIAL RISK GLOBAL<br>ASSESSMENT (Gijón<br>Questionnaire*) (n=283) | Risk free                            | 136         | 71.2 | 30                          | 22.1 | 17                               | 12.5 | 66                              | 48.5 | 23                            | 16.9 | 0.000   |
|                                                                    | At risk/with socio-familial problems | 55          | 28.8 | 7                           | 12.7 | 21                               | 38.2 | 15                              | 27.3 | 12                            | 21.8 |         |
| VARIABLES OF THE GIJÓN QUESTIONNAIRE DICHOTOMIZED                  |                                      | n           | %    | n                           | %    | n                                | %    | n                               | %    | n                             | %    |         |
| LOW LEVEL OF INCOME<br>(n=204)                                     | Yes                                  | 141         | 69.1 | 21                          | 14.9 | 36                               | 25.5 | 54                              | 38.3 | 30                            | 21.3 | 0.011   |
|                                                                    | No                                   | 63          | 30.9 | 18                          | 28.6 | 9                                | 14.3 | 30                              | 47.6 | 6                             | 9.5  |         |
| LIVE ALONE (n=219)                                                 | Yes                                  | 52          | 23.7 | 10                          | 19.2 | 11                               | 21.2 | 20                              | 38.5 | 11                            | 21.2 | 0.954   |
|                                                                    | No                                   | 167         | 76.3 | 32                          | 19.2 | 35                               | 21.0 | 70                              | 41.9 | 30                            | 18.0 |         |
| ABSENCE OF SOCIAL<br>RELATIONSHIPS (n=221)                         | Yes                                  | 0           | 0.0  | 0                           | 0.0  | 0                                | 0.0  | 0                               | 0.0  | 0                             | 0.0  | n. c.   |
|                                                                    | No                                   | 221         | 100  | 43                          | 19.5 | 46                               | 20.8 | 90                              | 40.7 | 42                            | 19   |         |
| ABSENCE OF SOCIAL SUPPORT<br>(n=212)                               | Yes                                  | 0           | 0.0  | 0                           | 0.0  | 0                                | 0.0  | 0                               | 0.0  | 0                             | 0.0  | n. c.   |
|                                                                    | No                                   | 212         | 100  | 41                          | 19.3 | 43                               | 20.3 | 87                              | 41.0 | 41                            | 19.3 |         |
| INADEQUATE HOUSING<br>(n=220)                                      | Yes                                  | 41          | 18.6 | 4                           | 9.8  | 15                               | 36.6 | 11                              | 26.8 | 11                            | 26.8 | 0.007   |
|                                                                    | No                                   | 179         | 81.4 | 38                          | 21.2 | 31                               | 17.3 | 79                              | 44.1 | 31                            | 17.3 |         |

\* Gijón Scale: minimum score =5 and maximum =25 points. Sections: <10 indicates no socio-familial risk, 10 to 14 in risk, >15 problems.; n. c. = calculation is not possible due to lack of observations.

Figure S1. Summary multinomial regression change in self-perceived health: Global data.

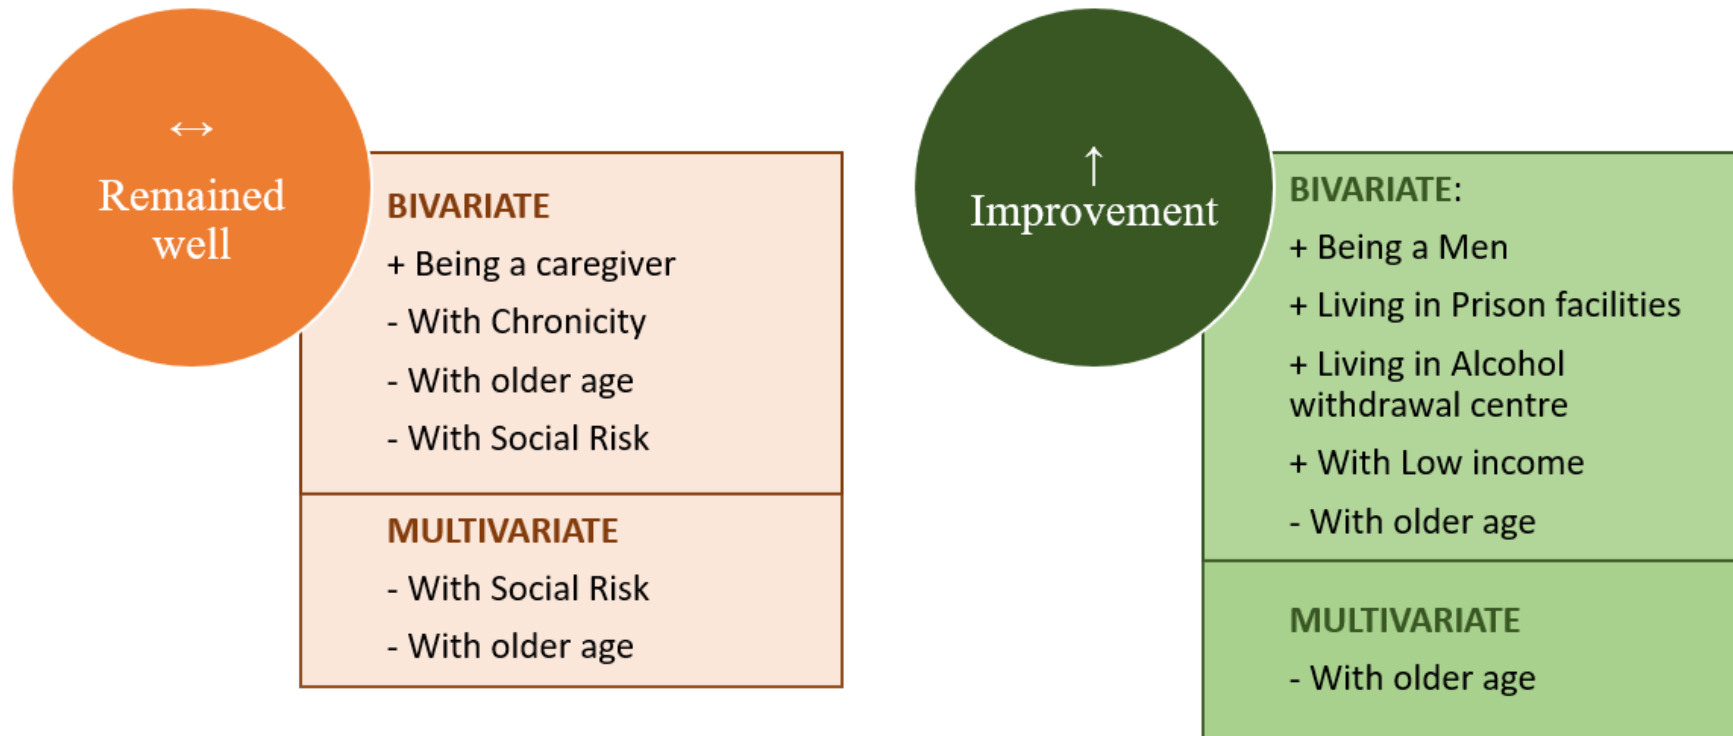

+: increases the probability versus “worsening or no improvement”

-: decreases the probability versus “worsening or no improvement”

Figure S2. Summary multinomial regression change in self-perceived health: Men.

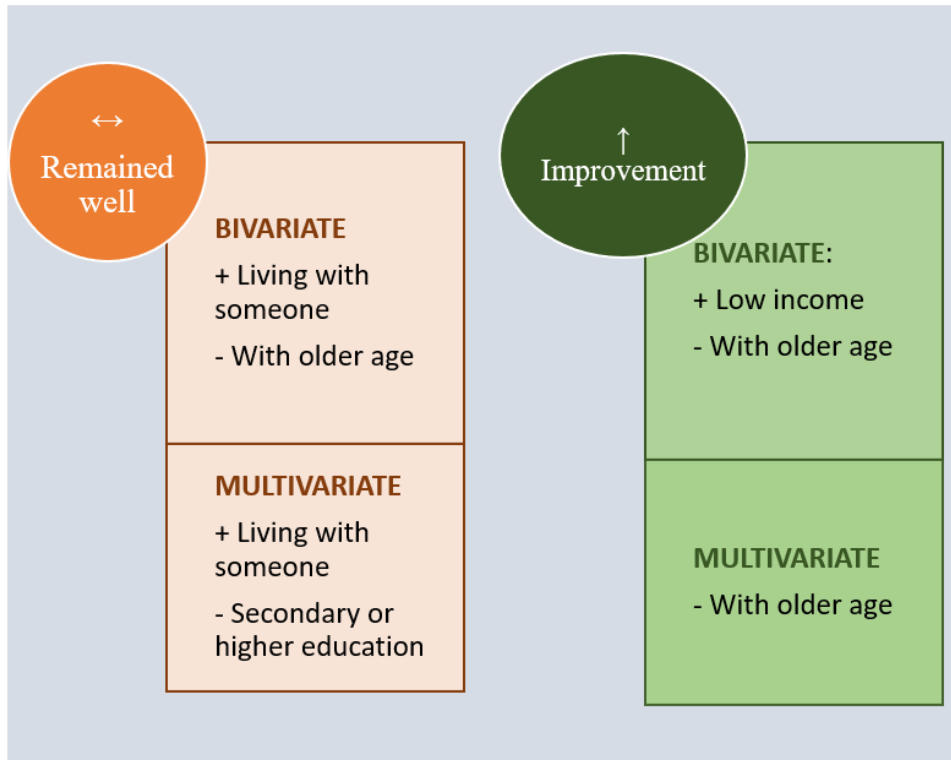

+: increases the probability versus “worsening or no improvement”  
 -: decreases the probability versus “worsening or no improvement”

Figure S3. Summary multinomial regression change in self-perceived health: Women.

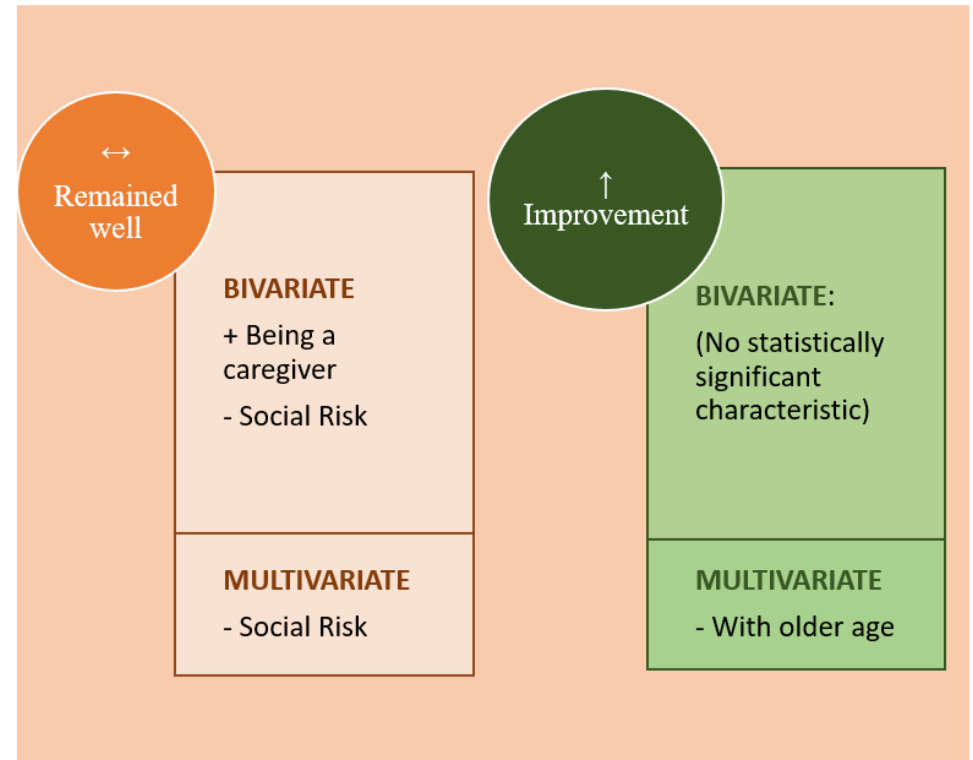

+: increases the probability versus “worsening or no improvement”  
 -: decreases the probability versus “worsening or no improvement”
